# Supplementary material for: SOX9 and SOX10 control fluid homeostasis in the inner ear for hearing through independent and cooperative mechanisms
Source: PubMed Central journal article supplement — Proc Natl Acad Sci U S A. 2022 Nov 7;119(46):e2122121119. doi: 10.1073/pnas.2122121119 (PMC9674217; doi:10.1073/pnas.2122121119), 2022-11-07
Supplement: pnas.2122121119.sapp.pdf [file pnas.2122121119.sapp.pdf]

## Supplementary Information for SOX9 and SOX10 control fluid homeostasis in the inner ear for hearing through independent and cooperative mechanisms

Irene, Y.Y. Szeto<sup>1†\*</sup>, Daniel, K.H. Chu<sup>1¶</sup>, Peikai Chen<sup>1||¶</sup>, Ka Chi Chu<sup>1</sup>, Tiffany, Y. K. Au<sup>1</sup>, Keith, K.H. Leung<sup>1</sup>, Yong-Heng Huang<sup>2‡</sup>, Sarah, L. Wynn<sup>1</sup>, Angel, C.Y. Mak<sup>1§</sup>, Ying-Shing Chan<sup>1</sup>, Wood Yee Chan<sup>3</sup>, Ralf Jauch<sup>1,2</sup>, Bernd Fritsch<sup>4</sup>, Mai Har Sham<sup>1,\*</sup>, Robin Lovell-Badge<sup>5</sup>, Kathryn, S.E. Cheah<sup>1\*</sup>

<sup>1</sup>School of Biomedical Sciences, The University of Hong Kong, Li Ka Shing Faculty of Medicine, 21 Sassoon Rd, Hong Kong, China.

<sup>2</sup>Genome Regulation Laboratory, CAS Key Laboratory of Regenerative Biology, Joint School of Life Sciences, Guangzhou Institutes of Biomedicine and Health, Chinese Academy of Sciences, Guangzhou 510530, China; Guangzhou Medical University, Guangzhou 511436, China.

<sup>3</sup>School of Biomedical Sciences, The Chinese University of Hong Kong, Lo Kwee-Seong Integrated Biomedical Sciences Building, Shatin, Hong Kong, China.

<sup>4</sup>Department of Biology, College of Liberal Arts & Sciences, University of Iowa, Iowa City, IA 52242, USA.

<sup>5</sup>Francis Crick Institute, 1 Midland Road, London, NW1 1AT, UK.

Present addresses: †Department of Molecular Medicine, Max Planck Institute of Biochemistry, 82152 Martinsried, Germany; ‡ Center for Cell Lineage and Atlas (CCLA), Bioland Laboratory (Guangzhou Regenerative Medicine and Health GuangDong Laboratory), Guangzhou 510005, China; § Department of Medicine, University of California, San Francisco, 1550 4th St, Box 2911, San Francisco, CA 94143; ||Hong Kong University – Shenzhen Hospital, 1 Haiyuan Rd, Shenzhen, China; \*School of Biomedical Sciences, The Chinese University of Hong Kong, Lo Kwee-Seong Integrated Biomedical Sciences Building, Shatin, Hong Kong, China

¶Equal contribution.

\*Corresponding author

Email: [kathycheah@hku.hk](mailto:kathycheah@hku.hk) (K.S.E.C)

### This PDF file includes:

- Supplementary text methods
- Figures S1 to S6
- Tables S1 to S2
- Legends for Movies S1 to S5
- Legends for Datasets S1 to S2
- SI References

### Other supplementary materials for this manuscript include the following:

- Movies S1 to S5
- Datasets S1 to S2

## Supplementary Methods

### Endocochlear potential measurement

Two small bone screws (1 mm diameter, FHC) used as recording electrodes were fixed above the cerebellum on either side of the midline. Two stainless steel pins (0.5 mm diameter) were inserted subcutaneously into the left and right pinnae to serve as reference electrodes. One stainless steel pin was inserted subcutaneously at the mid-position of the lower jaw to serve as the ground electrode.

Sound stimulation with 0.1 ms rectangle pulse and sound pressure level of 35-120 dB was used. Signals collected from recording electrodes were amplified (x 10,000) by amplifier (Grass P55) with a band pass filter 100-3,000 Hz and were then sampled by PowerLab system (PowerLab 4SP, AD Instruments) at 40 kHz. Auditory brainstem responses (ABR) obtained from 512 or 1,024 stimuli were averaged by software (Scope). Auditory threshold was defined as the lowest stimulus intensity at which an ABR was observed in 2 averaged runs.

To measure the endocochlear potential, a small hole just big enough for the recording electrode was opened on the basal turn of the cochlea. A glass micropipette filled with 150 mM KCl was advanced up to the outside of spiral ligament. The baseline of the recording was set to zero. Stable endocochlear potential was recorded by inserting the probe into the endolymphatic space. A silver wire was placed under the skin on the vertex of the skull as reference electrode.

### Scanning electron microscopy (SEM), analyses of sound conducting chambers and cochlear lumen

Inner ears from *B2-Sox9<sup>c<sup>Y440X/+</sup></sup>* mice and control littermates at P4 were processed for SEM as follows. Inner ears from fetuses were dissected in 0.1 M sodium phosphate buffer quickly and fixed for 5-6 hours in 2.5% glutaraldehyde (EM grade Sigma) in 0.1 M sodium phosphate buffer. Fixed cochleae were further dissected to expose the organ of Corti, followed by removal of the tectorial membrane. The samples were then post-fixed in 1% osmium tetroxide for 1 hour, dehydrated in a graded series of ethanol solutions and dried by Critical Point Drying. The samples were mounted, coated by sputtering (Edwards sputter coater S150B) and ready to be observed by scanning electron microscope (JEOL JSM 6301F).

### Quantitation of cochlea lumen

Adult inner ear of both *B2-Sox9<sup>c<sup>Y440X/+</sup></sup>* and control adult mice were analysed by three-dimensional reconstruction of 5 µm sections and measurement of sound-conducting chambers. The sound-conducting chambers, namely, scala vestibuli, scala media and scala tympani were outlined manually and color-coded. One in every three consecutive sections was outlined and 100-150 sections were outlined for each sample. The area of the outlined chambers was calculated by the software NeuroLucida. The volume of the chambers was calculated as follows: sum of chamber area of all sections x no. of interval slides (i.e. 3) x thickness (i.e. 5 µm). Heads of both E15.5 mutant and control embryos were sectioned in sagittal plane at 7 µm thickness. five sections of basal cochlear lumens in each embryo (n=4-5) were manually outlined and the outlined areas were calculated using ImageJ software.

## Single cell RNA-seq (scRNAseq)

Endolymphatic sacs of WT and mutant were harvested together with surrounding tissues as described (1) and incubated in 1 mg/ml collagenase (LS004194, Worthington, Lakewood, NJ) and 1 mg/ml dispase (LS02100, Worthington) in DMEM/F12 at 37°C for 10 min. The epithelia were dissected from the rest of the tissues in 10% fetal bovine serum (FBS) in DMEM/F12 (Gibco). Finally, the isolated epithelia were digested in 50 µl of 0.125% trypsin/EDTA/PBS for 15 min at 37°C. 50 µl of 10% FBS in DMEM/F12 was subsequently added to stop the reaction. The epithelia were gently triturated with 200 µl pipette tips and transferred to a 6 cm<sup>2</sup> tissue culture dish. Single cells were dissociated from E14.5 ESs of WT (n=3) and *Sox9*<sup>Y440X/+</sup> embryos (n=2) for RNA-seq as described in (2). ScRNAseq was performed on manually picked single cells (246 cells: 91 WT and 155 mutant cells) using the Smartseq protocol.

scRNAseq libraries were constructed according to Picelli *et al* in two batches (3), before being sequenced with Illumina HiSeq 1500 (first batch) and NovaSeq 6000 (second batch), at the Centre for PanorOmic Sciences (CPOS) of the University of Hong Kong.

Each cell has on average 4.5 million read-pairs, of which 89% have Phred quality scores over 30. The reads were mapped to mouse genome mm10 by HISAT2 aligner (4) and sorted by Samtools (v1.8) (5) with an average overall mapping rate of 81.8%. Raw read counts were performed by the HTSeq-count package (6) and expression levels were normalized by Cufflinks (7), using gene annotation file from GENCODE (8). A median of 3,638 protein coding genes were detected per cell, which were comparable among the subsequently identified populations.

## Bioinformatics analyses

Informative markers were unbiasedly detected based on over-dispersion using the PAGODA package (9) before principal component analysis (PCA) was performed using the built-in PCA functions of R package. Genome-wide PCA was also formed. Dimension reduction methods such as tSNE was applied showing comparable results (10). Given the small cell number, PCA patterns were adopted for discussion. Differentially expressed genes (DEGs) were detected by MAST (11). To detect DEGs experiencing ectopic differences, and not level differences, a further cut-off of 'ratio-gap', the difference of expressed percentages in two groups of cells, greater than 20% was applied, on top of the FDR<0.05 measure. Gene-ontology (GO) and pathway analysis were performed by GSEA (12). Pseudotime trajectory was conducted using Monocle (13); regulon analyses were carried out using the SCENIC package (14). Cell maturity was predicted by the "pseudotime quantity" and empirical entropy. Higher entropy indicates more randomness (thus less regulated) in expression profiles, and thus higher chance of being progenitor-like. Empirical entropy for cell *i* was calculated based per-cell expression profile:  $S_i = -\sum_j p_j \log_2 p_j$  where  $p_j$  is the frequency (number of genes) at level *j* (rounded to integer for logarithm of raw counts) for all levels greater than zero.

## RT-qPCR *In situ* hybridization, hybridization chain reaction

*In situ* hybridization using digoxigenin-labeled riboprobes was performed as previously described (15). HCR were performed with reference to the HCR v3.0 protocol (Molecular Technologies).

For RT-qPCR, total RNA was extracted from cochlea tissue dissected from P3 neonates using TRIZOL according to the manufacturer's instructions. cDNAs were synthesized by Superscript II (Invitrogen) and targets were amplified using qPCR master mix (TAKARA) on the StepOne Plus

real time PCR system (Life technologies). Primers are described in *SI Appendix*, Dataset S2. Expression levels were normalized to the expression of the housekeeping gene *HPRT* or *Gapdh*. HCR experiments were performed with reference to the HCR v3.0 protocol (Molecular Technologies). Embryos were fixed in 4% paraformaldehyde overnight at 4°C, dehydrated with ethanol and embedded in paraffin for sectioning. Sections were rehydrated and permeabilized with 10 µg/ml proteinase K in PBS at 37°C for 10 min, followed by washing, pre-hybridization and hybridization with DNA probes overnight at 37°C. Excessive probes were removed by sequential washings. Sections were incubated with hairpin solutions overnight at room temperature, washed with 5X SSCT and mounted with anti-fading medium with DAPI (H-1200, Vector Laboratories). Probe sets are described in *SI Appendix*, Dataset S2.

### **Protein production**

pDEST-hisMBP-SOX9-NHMG was kindly provided by Dr. Saravanan Vivendakan and verified by DNA sequencing (Life Technologies). SOX9-HMG, hisSOX9-HMG and hisSOX10-HMG were purified as described (16). The SOX10-DIM constructs were PCR amplified from mouse *Sox10* cDNA [AccNo. BC023356] using SOX10-DIM-for & SOX10-rev. pENTR/SOX10-DIM and pDEST-hisMBP/SOX10-DIM constructs were generated using Gateway BP and LR Cloning systems (Life Technologies). Proteins were essentially purified with established protocols (16) with the following modification. The destination plasmids were transformed into *Escherichia coli* BL21 (DE3) cells (TIANGEN BIOTECH). Positive clones were picked and cultured in LB (Luria-Bertani) medium containing 100 µg/ml Ampicillin at 37°C. The overnight inoculum was diluted 100-fold with fresh TB (Terrific Broth) containing 100 µg/ml Ampicillin and 0.2% glucose and further grown at 37°C and 220 rpm. When the OD<sub>600</sub> reached 0.6-0.9, protein expression was induced with 0.5 mM isopropyl-β-D-thiogalactopyranoside (IPTG) for 18 hrs at 18°C. Bacterial cells were harvested by centrifugation at 8,000 g for 30 min at 4°C, and the pellet resuspended in 50 ml Buffer A (20 mM Tris-HCl pH 8.0, 500 mM NaCl, 10 mM Imidazole) per 10 g pellet. Cells were disrupted using a high-pressure device (Guangzhou JuNeng Biology & Technology, JN3000 PLUS Low Temperature Ultra-High Pressure Continuous Flow Cell Disruption) at 4°C and 1200-1500 bar for 3-6 times. Lysate and debris were separated by centrifugation at 20,000 g for 30 min at 4°C. The supernatant was further cleared using MILLEX GP 0.22 µm filter unit (Millipore). Fusions proteins were bound to Ni-NTA Agarose beads (Qiagen) for 1-2 h at 4°C. Beads were washed with Buffer B (20 mM Tris-HCl pH 8.0, 500 mM NaCl, 30 mM Imidazole) until 10 µl of the wash flow through does not cause a change of color to 1 ml of Bradford reagent (GE Healthcare). HisMBP-Sox9-NHMG and HisMBP-Sox10-DIM fusing proteins were eluted with buffer C (20 mM Tris-HCl pH8.0, 100 mM NaCl, 300 mM Imidazole) and the tobacco etch virus (TEV) protease was added at a 1:100 weight per weight ratio. The Sox9-NHMG and Sox10-DIM were further purified using a Resource S column (GE Healthcare) that was connected to AKTA Express system (GE Healthcare) and eluted by gradually increasing the NaCl concentration from 0.1 M to 1 M at a flow rate of 1 ml/min. SOX9-NHMG OR SOX10-DIM containing fractions were pooled, buffer exchanged into Desalt Buffer (20 mM Tris-HCl pH 8.0, 100 mM NaCl) using PD-10 desalting columns (GE Healthcare), concentrated using VS 2011 Ultrafiltration Concentration Devices (Sartorius Stedim Biotech GmbH), aliquoted and stored at -80°C.

### **Electrophoretic mobility shift assays (EMSA)**

For EMSA Recombinant SOX9 and SOX10 protein constructs were expressed using *Escherichia coli* BL21 (DE3) and purified by immobilized metal affinity chromatography, ion exchange chromatography and desalting as described previously (17). EMSAs were carried out as described



using DNA oligos (Beijing Genome Institute) labelled with 5' Cy5 on the forward strand. The canonical motif sequence was promoter sequence of the CD-Rap gene (18).

Binding reactions containing 25 nM dsDNA with varying concentrations of Sox proteins in 1× Reaction Buffer (10 mM Tris-HCl pH 8.0, 0.1 mg/mL BSA, 50 μM ZnCl<sub>2</sub>, 100 mM KCl, 10% Glycerol, 0.10% NP-10, 2 mM 2-mercaptoethanol) were incubated for 4 h at 4°C in the dark. 10 μl (for 10 wells gel) or 6.7 μl (for 15 wells gel) of the reactions were loaded onto a pre-run 12% native 1× Tris-glycine (25 mM Tris pH 8.3; 192 mM glycine) gel, and electrophoresed at 200 V for 30-45 min at 4°C. Gels were imaged using a Fuji FL-7000 scanner (GE healthcare) and band intensities were quantified using ImageQuant TL. Homodimer cooperativity factors were estimated as described (19)

### **Chromatin immunoprecipitation assay**

E14.5 inner ear tissue lysates were crosslinked, lysed and sonicated to yield DNA fragments of 200-500 bp. Immunoprecipitation on the chromatin was performed using anti-SOX9 (AB5535, Millipore), anti-SOX10 (gift of Dr. M. Wegner) and a serum control. The target fragments in *Aqp3* and *Crygb* were amplified by standard PCR or real time PCR.

### **Luciferase reporter assays**

mIMCD3 cells (ATCC CRL-2123) were transfected using GeneJuice (Millipore) according to the manufacturer's instructions. Co-transfection experiments were performed with 80 ng each of the reporter, 20 ng each of the expression constructs and 10 ng of pRL-TK Renilla luciferase (Promega) as internal standard. The amount of total DNA per transfection was kept constant by adding empty vector pCALL2 together with Sox9, Sox9-Y440X and Sox10 expression construct. Luciferase activities (relative light unit RLU) were measured using the Dual Luciferase Reporter Assay System (Promega) after 48 hours of transfection. The relative fold of suppression or activation is expressed as the normalized value of relative light unit (RLU) of reporter and expression construct to reporter alone. All data and statistical tests are the results of at least 3 independent transfection experiments.

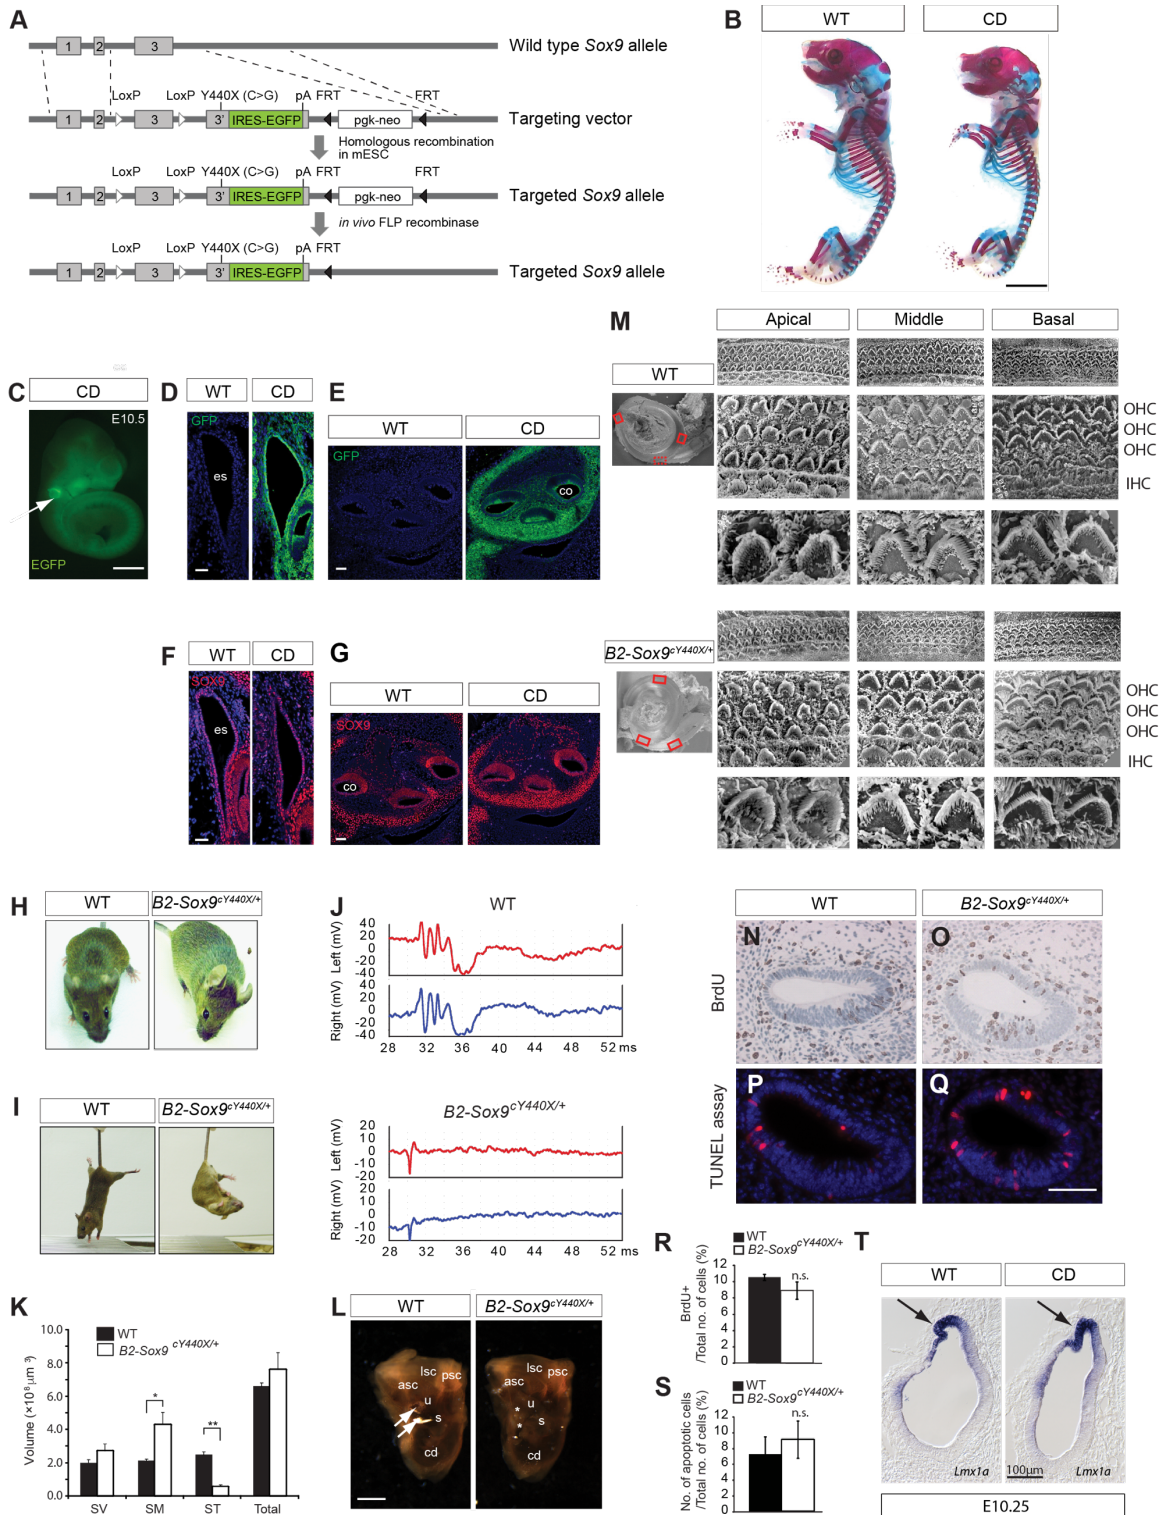

**Fig. S1.** Conditional *Sox9-floxed-Y440X* allele and mutant phenotype in the inner ear. (A) Schematic diagram of the targeting strategy. *Pgk-neo* was removed by crossing to FLP-recombinase mice (20). (B) Alizarin red and alcian blue stained skeletons of WT and CD *Sox9<sup>Y440X/+</sup>*(CD) newborn mice. Note skeletal abnormalities characteristic of CD e.g. campomelia (bent bones) of the appendicular skeleton, shortened craniofacial and axial skeleton. (C-E) EGFP expression in the otic vesicle (arrow) of *Sox9<sup>Y440X/+</sup>*(CD) embryo at E10.5 (n=3) (C), endolymphatic sac (n=3) (D) and cochlea (n=3) (E) at E14.5 (n=2). (F and G) SOX9 expression in WT and CD endolymphatic sac (F) and cochlea (G) at E14.5 (n=2). (H) *B2-Sox9<sup>cY440X/+</sup>* mutants showed a tilted head and body posture (I) failed tests for reaching response (n=5). (J) A characteristic waveform of auditory brainstem response recorded from both sides (left in red and right in blue) after a 0.1 ms rectangular pulse at 65 dB and 110 dB was applied to a WT and *B2-Sox9<sup>cY440X/+</sup>* adult mouse at 6-month respectively (n=5). (K) The volume of sound-conducting chamber equals to section area ( $\mu\text{m}^2$ ) x thickness ( $\mu\text{m}$ ) x no. of interval slides in  $\mu\text{m}$  (n=3). The total volume of the cochlea was not significantly different but the scala media and scala tympani were larger (2-fold) (\* $p < 0.05$ ) and smaller (one-third) (\*\* $p < 0.01$ ) in the mutant, respectively. (L) Otoconia deficiency (\*) in *B2-Sox9<sup>cY440X/+</sup>* mutant at P9 (n=3, both ears). U, utricle, S, saccule, asc, lsc, psc, anterior, lateral and posterior semi-circular canals. (M) Normal hair cell and stereocilium arrangement in apical, middle and basal regions of the *B2-Sox9<sup>cY440X/+</sup>* mutant cochlea at P4 (n=4) by scanning electron microscopy. (N-Q) Proliferation and apoptosis *B2-Sox9<sup>cY440X/+</sup>* cochlea at E14.5. (N, O and R) The number of BrdU positive cells (brown) counted against the total number of epithelial cells (blue) (n=5). (P and Q) TUNEL assay. (S) The number of apoptotic cells (red) counted against the total no. of epithelial cells (blue). (n=5). The total number of cells within the otic epithelium is not significantly different between the WT and mutant cochlea. n.s. not significant. (T) Prospective endolymphatic sac (arrow) marked by *Lmx1a* RNA probes at E10.25 (n=2, both ears). ch, chondrocyte; co, cochlea; es, endolymphatic sac. \* $p < 0.05$  and \*\* $p < 0.01$ . Scale bar = 0.5 cm (B), 0.5 mm (C), 5 mm (L-M), 100  $\mu\text{m}$  (T).

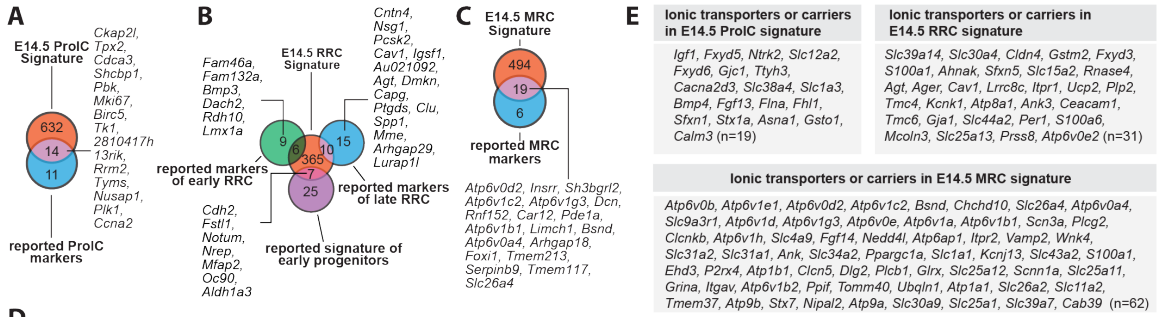

**E** Ionic transporters or carriers in E14.5 ProC signature (19 genes): *Igf1, Fxyd5, Ntrk2, Slc12a2, Fxyd6, Gjc1, Tlyh3, Cacna2d3, Slc38a4, Slc1a3, Bmp4, Fgf13, Flna, Fhl1, Sfxn1, Stx1a, Asna1, Gsto1, Calm3 (n=19)*.

**Ionic transporters or carriers in E14.5 RRC signature (n=31):** *Slc39a14, Slc30a4, Cldn4, Gstm2, Fxyd3, S100a1, Ahnak, Sfxn5, Slc15a2, Rnase4, Agt, Ager, Cav1, Lrrcb, Itpr1, Ucp2, Plp2, Tmc4, Kcnk1, Atp8a1, Ank3, Ceacam1, Tmc6, Gja1, Slc44a2, Per1, S100a6, Mcoln3, Slc25a13, Prss8, Atp6v0e2 (n=31)*.

**Ionic transporters or carriers in E14.5 MRC signature (n=62):** *Atp6v0b, Atp6v1e1, Atp6v0d2, Atp6v1c2, Bsnd, Chchd10, Slc26a4, Atp6v0a4, Slc9a3r1, Atp6v1d, Atp6v1g3, Atp6v0e, Atp6v1a, Atp6v1b1, Scn3a, Plcg2, Clcnkb, Atp6v1h, Slc4a9, Fgf14, Nedd4l, Atp6ap1, Itpr2, Vamp2, Wnk4, Slc31a2, Slc31a1, Ank, Slc34a2, Ppargc1a, Slc1a1, Kcnj13, Slc43a2, S100a1, Ehd3, P2rx4, Atp1b1, Clcn5, Dlg2, Plcb1, Glrx, Slc25a12, Scnn1a, Slc25a11, Grina, Itgav, Atp6v1b2, Ppif, Tomm40, Ubqln1, Atp1a1, Slc26a2, Slc11a2, Tmem37, Atp9b, Stx7, Nipal2, Atp9a, Slc30a9, Slc25a1, Slc39a7, Cab39 (n=62)*.

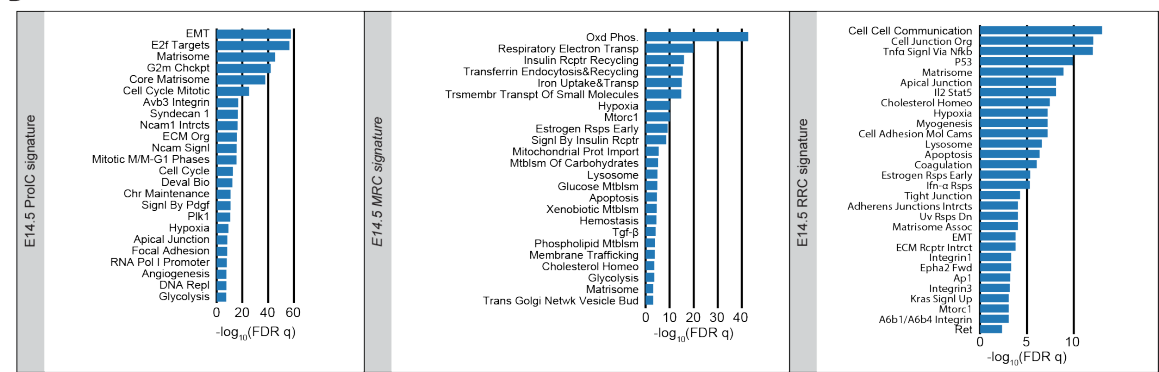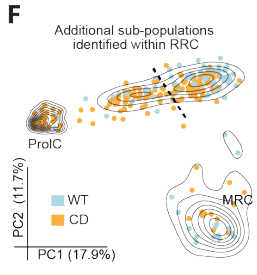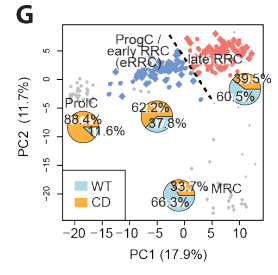

**H** Reported cell populations in the ES and their signature genes.

| Population        | Signature Genes                                                        | exp              | OR      |
|-------------------|------------------------------------------------------------------------|------------------|---------|
| MRC (n=25)        | <i>Tmem213</i>                                                         | n=1; exp=0.46    | OR=2.2  |
| Early Prog (n=32) | <i>Aldh1a3, Igfbp2, Cdkn1c, Ccnd2, Meg3, Mest</i>                      | n=6; exp=0.136   | OR=44.1 |
| ProC (n=25)       |                                                                        | n=0; exp=0.10625 | OR=0    |
| early RRC (n=15)  | <i>Rbms3, Fam132a</i>                                                  | n=2; exp=0.06375 | OR=31.4 |
| late RRC (n=25)   |                                                                        | n=0; exp=0.10625 | OR=0    |
| late RRC (n=368)  | <i>Cntn4, Nsg1, Pcsk2, Igsf1, Agt, Dmkn, Ptgds, Clu, Spp1, Lurap11</i> | n=10; exp=0.46   | OR=21.7 |
| ProC/eRRC (n=85)  |                                                                        | n=0; exp=0.10625 | OR=0    |
| late RRC (n=368)  | <i>Col14a1, Oc90, Col2a1</i>                                           | n=3; exp=0.5888  | OR=5.1  |
|                   | <i>Prdx4</i>                                                           | n=1; exp=0.276   | OR=3.6  |

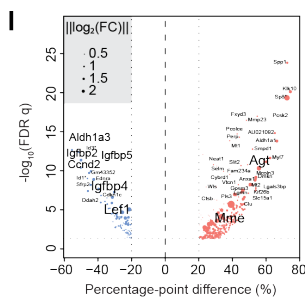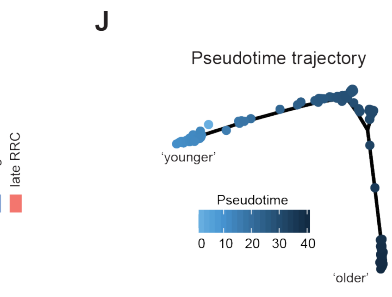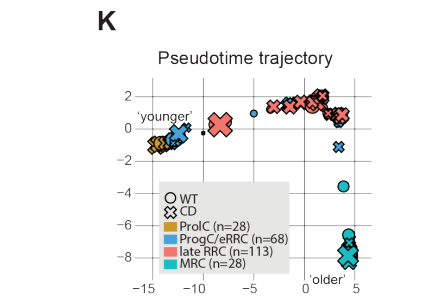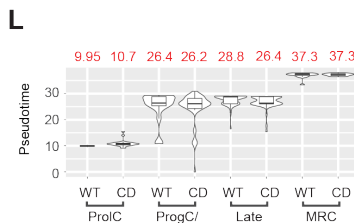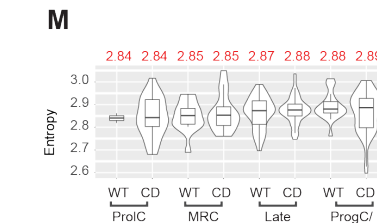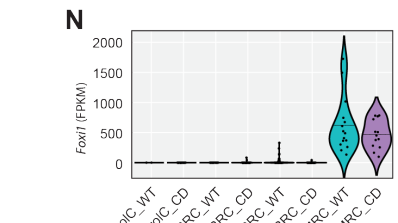

**Fig. S2.** scRNA-seq (E14.5 WT and *Sox9*<sup>Y440X/+</sup> (CD) endolymphatic sac) bioinformatics analysis. (A-C) Venn diagram comparing signatures of cell populations and reported markers. (D) Gene-ontology (GO) term analysis of the genes up-regulated in each of the three major populations against the remaining cells (signatures of each cell population). (E) Lists of ion channels and transporters found in each the signatures of each cell population. (F) Density contour plot of the 246 single cells identifying 2 additional sub-population in the RRC. (G) The proportion of CD cells in each of the four populations. The percentages were normalized by taking account into consideration the total WT and total CD cells. (H) Table comparing DEGs of ProgC/eRRCs and late RRCs, with reported population signatures. n, number observed; exp, expected; OR, odds ratio. (I) Volcano plot showing DEGs between ProgC/eRRC and late RRC. Percentage-point difference is the difference between the percentage of cells expressed in one group minus that in the other. (J and K) Pseudotime trajectory showing ProIC and ProgC/eRRCs are on one end, followed by late RRCs and MRCs. (L and M) Violin plots showing the predicted pseudotime quantities and entropy of the four cell populations in the two genotypes. (N) Violin plots showing expression of *Foxi1* in the scRNA-seq data.

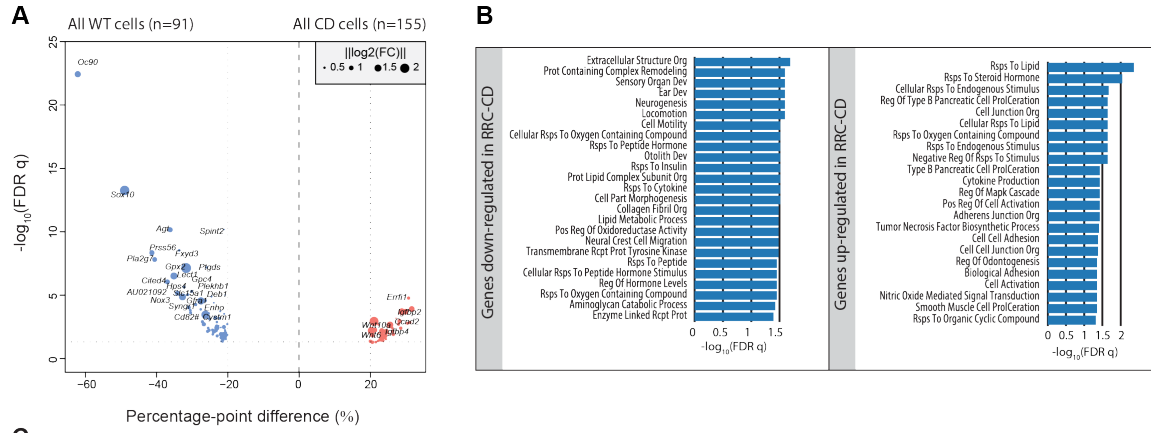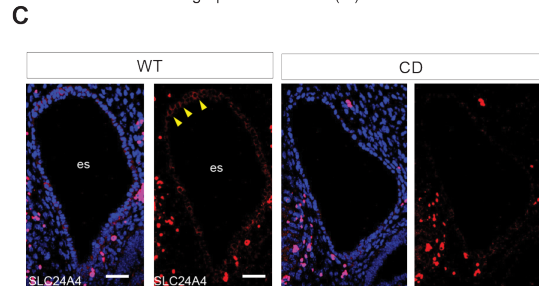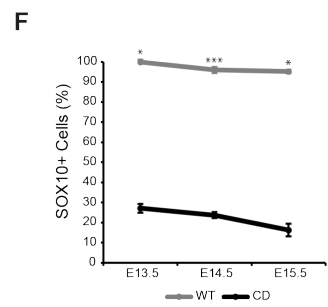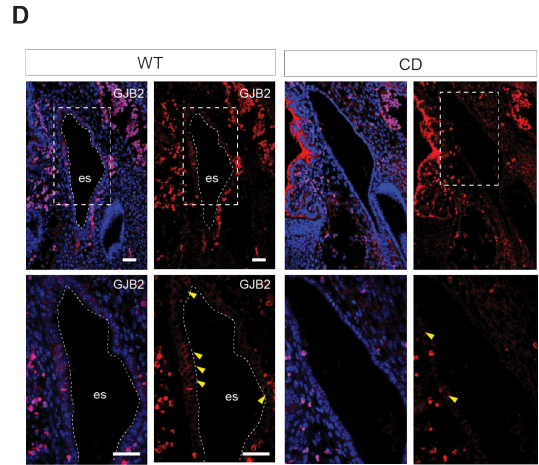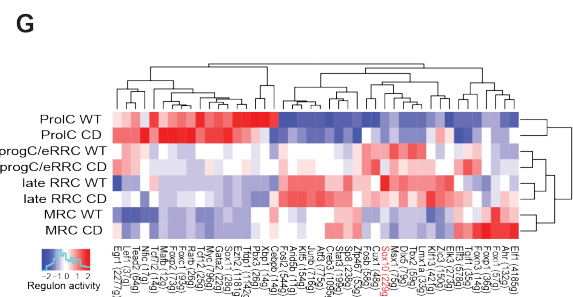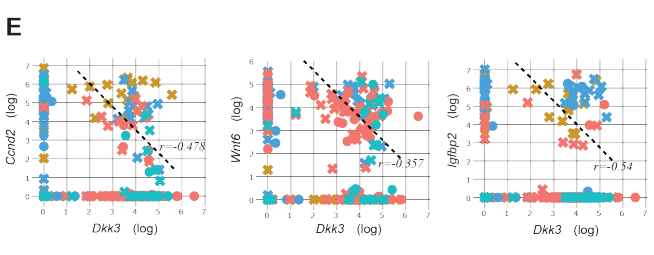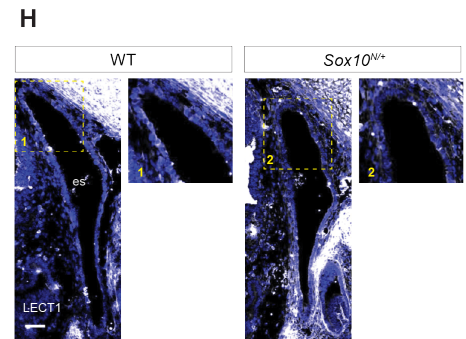

**Fig. S3.** Analysis on differential expressions revealed from scRNA-seq (E14.5 WT and *Sox9*<sup>Y440X/+</sup> (CD) endolymphatic sac (ES)) and downstream investigation. (A) Volcano plot showing DEGs between all WT and CD cells. Expressed ratio margin is the difference between the percentage of cells expressed in one group minus that in the other. (B) GO enrichment analysis of the DEGs between WT and CD RRC cells. (C) Immunostaining of SLC24A4 in the ES at E14.5 of WT and CD (n=2). (D) Immunostaining of GJB2 in the ES at E14.5 of WT and CD (n=2). (E) Scatter plots showing co-expression of *Ccnd2* (left), *Wnt6* (middle) and *Igfbp2* (right), with respect to *Dkk3*. r, Pearson correlation coefficient. (F) Quantification of percentage of SOX10-expressing cells in ES from E13.5 to E15.5 in WT and CD (n=2-3). (G) Regulon expression analysis reveals population-specific regulatory activities. (H) Immunostaining of LECT1 in the ES at E14.5 of WT and *Sox10*<sup>N/+</sup> (n=2). es, endolymphatic sac. \*p<0.05; \*\*\*p<0.001. Scale bar = 40  $\mu$ m.



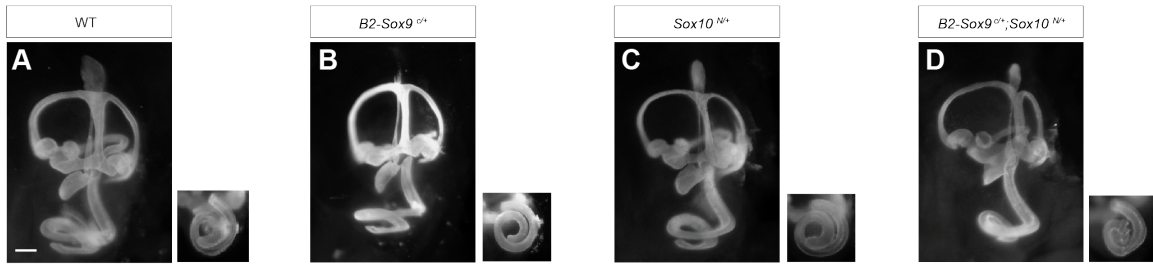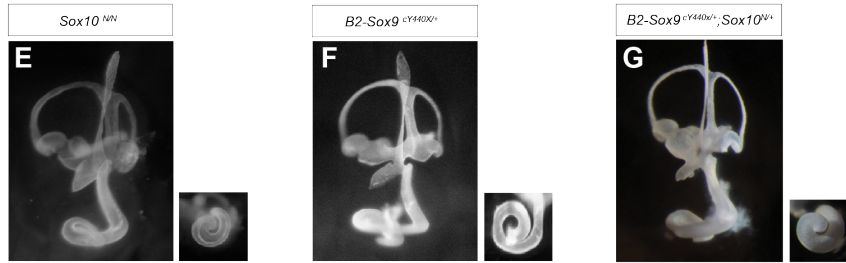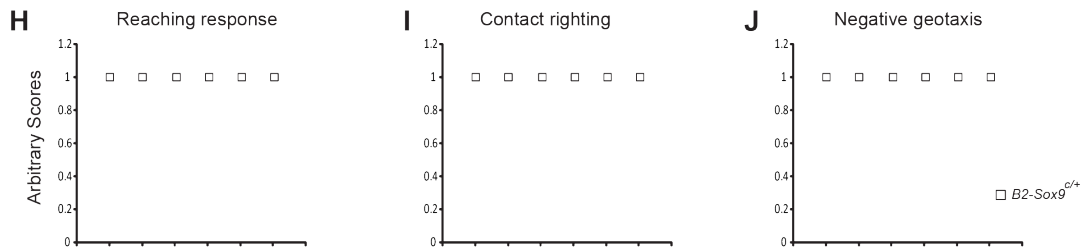

**K** Auditory Brainstem Response

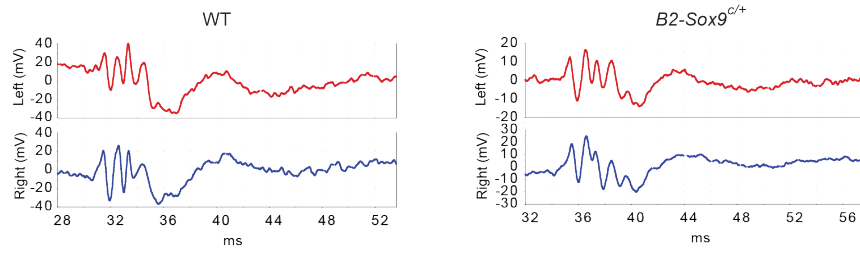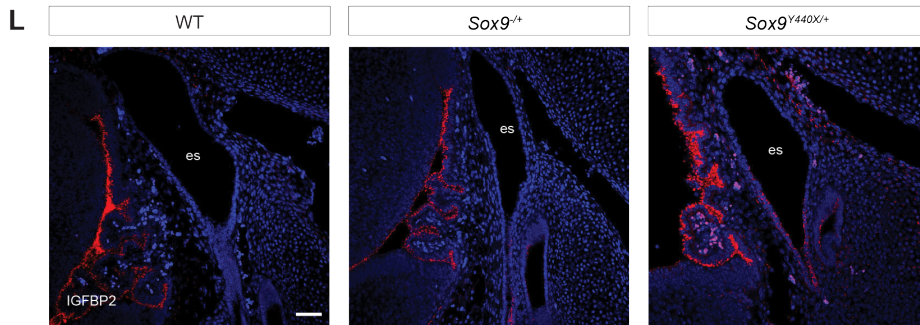



**Fig. S4.** Phenotype analysis of SoxE mutants. (A-G) Paint-fill analyses of inner ears of WT and mutants of *Sox9* and *Sox10* at E15.5. Paint-filling of the inner ears of these mutants revealed the cochlea of *Sox10<sup>NN</sup>* is shortened but gross truncations were not observed for the other genotypes (H-K) *B2-Sox9<sup>c/+</sup>* mutants passed all the tests for vestibular and hearing function (n=6). (H) Reaching response, (I) Contact righting, (J) Negative geotaxis, (K) Auditory brainstem response measured on both sides (left in red and right in blue) after a 0.1 ms rectangular pulse at 60 dB was given to both WT and *B2-Sox9<sup>c/+</sup>* adult mice (n=3). (L) IGFBP2 staining on E14.5 ES of WT, *Sox9<sup>/+</sup>* and *Sox9<sup>Y440X/+</sup>*. Scale bar = 200  $\mu$ m (A-G), 40  $\mu$ m (L).

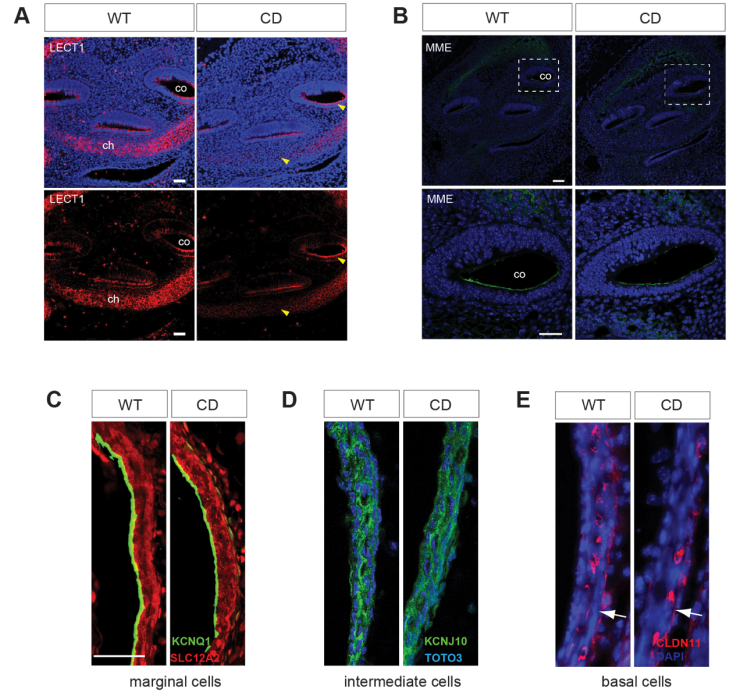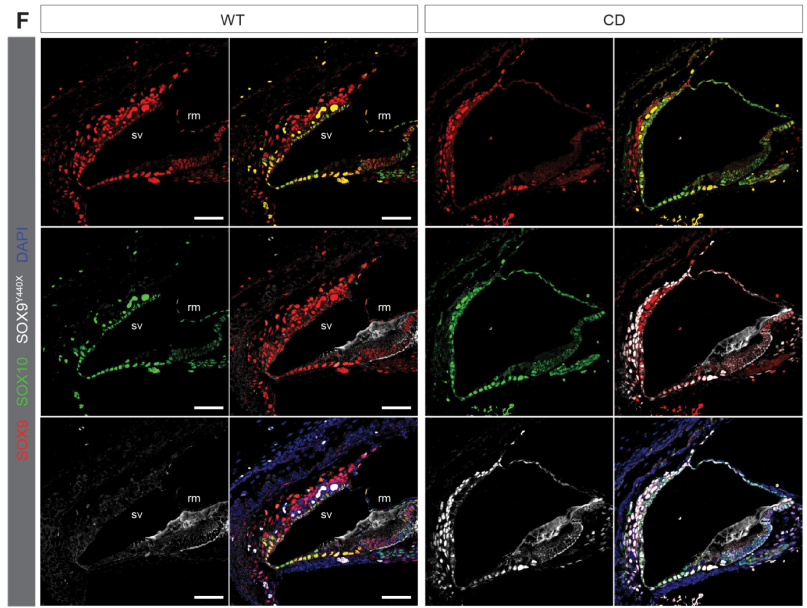

**Fig. S5.** Targeted analysis on embryonic cochlea (CO) and characterization of post-natal stria vascularis (SV) in WT and *Sox9<sup>Y440X/+</sup>* (CD). (A) Immunostaining of LECT1 in the CO at E14.5 of WT and CD (n=2). (B) Immunostaining of MME in the CO at E14.5 of WT and CD (n=2). (C-E) No morphological changes of stria vascularis in CD mutant at P3 (n=5-6). (C) Apical membrane of the marginal cells stained by KCNQ1 antibody and basolateral membrane of marginal cells stained by SLC12A2 antibody (D) Intermediate cells stained by KCNJ10 antibody (E) Basal cells (arrow) stained by CLDN11 antibody. (F) Immunostaining of SOX9, SOX10 and SOX9<sup>Y440X</sup> in the P5 CO (n=2). ch, chondrocyte; co, cochlea; rm, Reissner's membrane; sv, stria vascularis. Scale bar = 40  $\mu$ m (A, B and F), 50  $\mu$ m (C-E).

**A**

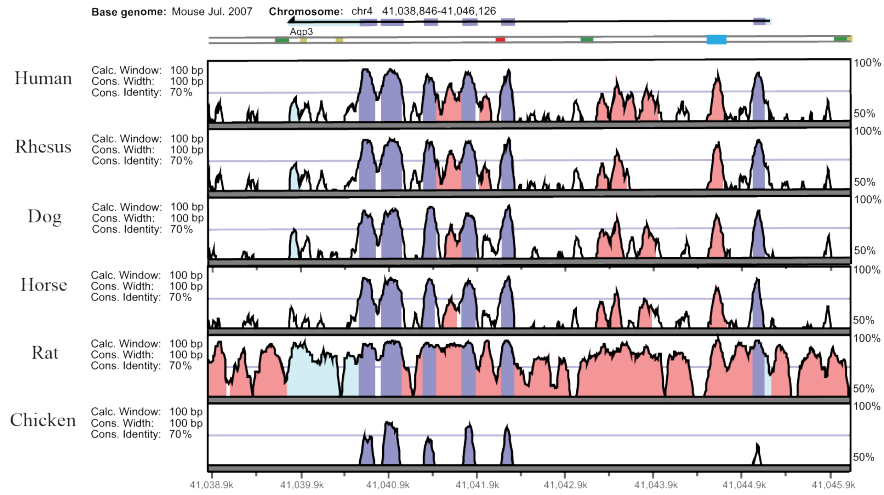

**B** *Aqp3* (5460bp) 1 transcript, mm9 chr4:4139757-41045216

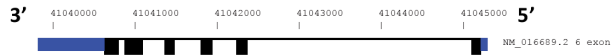

**Sox9 binding site co-ordinates mm9 4:41044631-41044636**

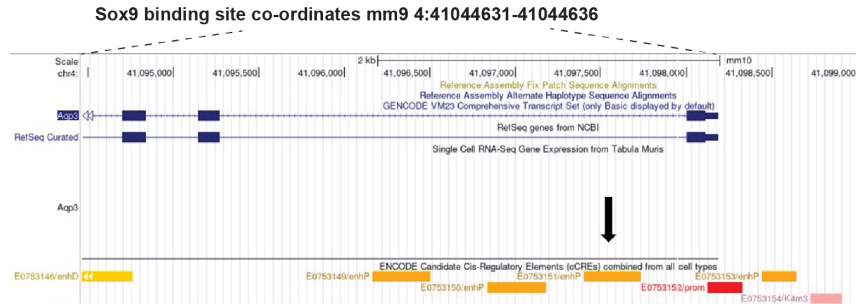

E0753151/enhP  
>mm10\_dna range=chr4:41097405-41097738 5'pad=0 3'pad=0 strand=+ repeatMasking=none  
ATCCGAAAGACTCCTACAGCGGTGCACAACACATTAGACGCGCCACT  
GTCTGTAGGCTCTGTTCCCTCCCAATCCCGTCTCCGATTTTC  
TGCTTACAGCCCAAGAAATCTGGGCCCTCTGCCCTACCTGCCGTAATCC  
GCCTCACTTCACTGCAACTTTTGGAGCTTCGAGGTTAATTAATCATTT  
AGGGCCAGACCCCAAGCCCAATACTTAATAGGGTGTCCATTTGC  
CTGCTGCTGCTCTGAGGTTGGAGCCCTGGGAAAGTTGGGAAGCCA  
GGAAACGTGTGGAGGTCACACTAAGGGGTGA

SOX9 binding site: COL2C2  
SOX10 binding site

**C**

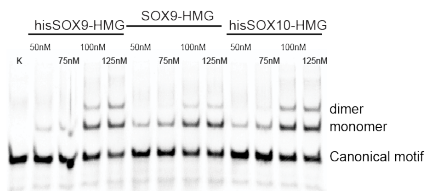

**D**

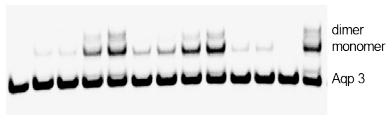

**E**

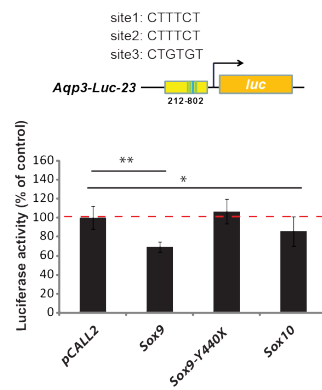

**F**

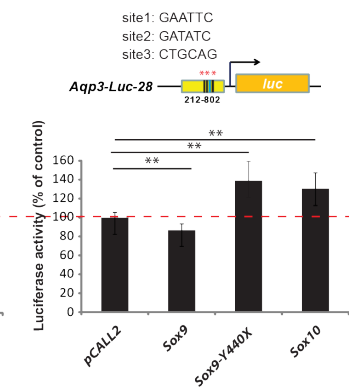

**Fig. S6.** Genomic analyses of the *Aqp3* locus and supplementary experimental information for demonstration of the interaction between SOX9 and SOX10 and their suppression on *Aqp3*. (A) Conserved SOX9 and SOX10 binding sites predicted by bsConserve and Jasper over a 205 bp conserved non-coding region (Cyan box) by Vista in intron 1 of *Aqp3*. (B) Human-mouse perfectly conserved matches to *Sox9* are indicated as vertical red lines. Scanning this region in HOCOMOCO v11 identified the region (chr4:41,044,565-41,045,962, accessible in the cochlea ATAC-seq) which contains an ENCODE candidate cis regulatory element (cCRE, (ENCODE candidate cis regulatory element) E0753151/enhP) with proximal enhancer features such as DNase hypersensitive sites, histone modification and CTCF binding sites. A SOX consensus (C[AT]TTG[AT][AT])86-89 was found in the 3' untranslated region while a COL2C2 (ATTCAT) *in vivo* SOX9 binding site (21) was found in intron 1. The region also contained the SOX10 binding consensus (mm9 chr4:41,045,517-41,045,527). (C, D) The SOX9-HMG, His-SOX9-HMG, His-SOX10-HMG proteins without dimerization (DIM) domains dimerized ineffectively on the (C) canonical and (D) *Aqp3* DNA (n=4). (E and F) Inhibition of *Aqp3* expression through SOX10 binding sites (n=3). (E) The activity of the WT regulatory element of *Aqp3* linked to a luciferase reporter (*Aqp3*-luc-23) was suppressed by SOX9 and SOX10. (F) This inhibition was alleviated when SOX10 binding sites were mutated (*Aqp3*-luc-28). Site 1 from CTTTCT to GAATTC; Site 2 from CTTTCT to GATATC; Site 3 from CTGTGT to CTGCAG. \*p<0.05; \*\*\*p<0.001.

**Table S1.** Frequency of ES/ED cells expressing marker genes at E13.5, E14.5 and E15.5 in WT and *Sox9<sup>Y440X/+</sup>* (CD).

| Gene            | Genotype | Stage | % Positive Cell | Fetuses analysed (n) | Number of Cell Quantified | t-test p-value (WT vs CD) |
|-----------------|----------|-------|-----------------|----------------------|---------------------------|---------------------------|
| IGFBP2          | WT       | E13.5 | 27.81           | 2                    | 331                       | 0.055451086               |
| IGFBP2          | CD       | E13.5 | 40.29           | 2                    | 342                       | 0.055451086               |
| IGFBP2          | WT       | E14.5 | 5.98            | 3                    | 841                       | 0.000221164               |
| IGFBP2          | CD       | E14.5 | 26.98           | 3                    | 773                       | 0.000221164               |
| IGFBP2          | WT       | E15.5 | 0               | 2                    | 242                       | 0.001382771               |
| IGFBP2          | CD       | E15.5 | 24.42           | 2                    | 487                       | 0.001382771               |
| SOX11           | WT       | E14.5 | 1.02            | 2                    | 372                       | 0.018721789               |
| SOX11           | CD       | E14.5 | 28.52           | 2                    | 328                       | 0.018721789               |
| AGT             | WT       | E14.5 | 98.52           | 2                    | 353                       | 0.000520816               |
| AGT             | CD       | E14.5 | 13.26           | 2                    | 330                       | 0.000520816               |
| MME             | WT       | E14.5 | 91.04           | 2                    | 212                       | 0.005800691               |
| MME             | CD       | E14.5 | 24.88           | 2                    | 258                       | 0.005800691               |
| FOXII1          | WT       | E14.5 | 15.72           | 3                    | 462                       | 0.036439376               |
| FOXII1          | CD       | E14.5 | 7.75            | 3                    | 415                       | 0.036439376               |
| <i>Atpdv0d2</i> | WT       | E14.5 | 12.44           | 3                    | 433                       | 0.003702273               |
| <i>Atpdv0d2</i> | CD       | E14.5 | 4.33            | 3                    | 184                       | 0.003702273               |
| SOX10           | WT       | E13.5 | 100             | 2                    | 422                       | 0.000441837               |
| SOX10           | CD       | E13.5 | 27.17           | 2                    | 225                       | 0.000441837               |
| SOX10           | WT       | E14.5 | 95.97           | 3                    | 984                       | 4.68218E-07               |
| SOX10           | CD       | E14.5 | 23.73           | 3                    | 618                       | 4.68218E-07               |
| SOX10           | WT       | E15.5 | 95.24           | 2                    | 424                       | 0.000861387               |
| SOX10           | CD       | E15.5 | 16.33           | 2                    | 455                       | 0.000861387               |
| SLC24A4         | WT       | E14.5 | 36.27           | 2                    | 207                       | 0.011515065               |
| SLC24A4         | CD       | E14.5 | 8.43            | 2                    | 222                       | 0.011515065               |
| GJB2            | WT       | E14.5 | 14.35           | 2                    | 202                       | 0.000225722               |
| GJB2            | CD       | E14.5 | 3.78            | 2                    | 209                       | 0.000225722               |

The proportions (%) of cells labelled with marker genes in ES/ED from CD mutant and WT control litter mates were determined. n, no. of fetuses analyzed.

**Table S2.** Frequency of ES/ED cells expressing marker genes at E14.5 in WT and Sox10<sup>N/+</sup> (N+).

| Gene   | Genotype | Stage | % Positive Cell | Fetuses analysed (n) | Number of Cell Quantified | t-test p-value (WT vs N+) |
|--------|----------|-------|-----------------|----------------------|---------------------------|---------------------------|
| IGFBP2 | WT       | E14.5 | 4.2             | 3                    | 419                       | 0.028656019               |
| IGFBP2 | N+       | E14.5 | 13.54           | 3                    | 406                       | 0.028656019               |
| AGT    | WT       | E14.5 | 95.55           | 2                    | 305                       | 0.024962483               |
| AGT    | N+       | E14.5 | 33.77           | 2                    | 252                       | 0.024962483               |
| FOXII1 | WT       | E14.5 | 23.36           | 2                    | 217                       | 0.150457916               |
| FOXII1 | N+       | E14.5 | 17.39           | 2                    | 229                       | 0.150457916               |

The proportions (%) of cells labelled with marker genes in ES/ED of E14.5 N+ mutants and WT control litter mates were determined. n, no. of fetuses analyzed.

**Movie S1.** Circling behavior of (B) surviving mouse line Sox9<sup>Y440X/+</sup> (n=6) versus (A) WT.

**Movie S2.** Swimming tests of (A) WT and (B) surviving mouse line Sox9<sup>Y440X/+</sup> (n=8).

**Movie S3.** Heading tossing and circling behavior of B2-Sox9<sup>cY440X/+</sup> compared to WT.

**Movie S4.** B2-Sox9<sup>cY440X/+</sup> failed the test of contact righting versus WT mouse.

**Movie S5.** B2-Sox9<sup>cY440X/+</sup> failed the test of negative geotaxis versus WT mouse.

**Dataset S1.** Lists of differentially expressed genes (DEGs) from comparisons of different cell populations.

**Dataset S2.** List of probes for Hybridization Chain Reactions (HCR), primers for qPCR and antibodies

### SI References

1. K. Honda, H. J. Lee, A. J. Griffith, I. Roux, Dissection of the Endolymphatic Sac from Mice. *J Vis Exp* 10.3791/62375 (2021).
2. K. Honda *et al.*, Molecular architecture underlying fluid absorption by the developing inner ear. *Elife* **6** (2017).
3. S. Picelli *et al.*, Full-length RNA-seq from single cells using Smart-seq2. *Nat Protoc* **9**, 171-181 (2014).
4. D. Kim, B. Langmead, S. L. Salzberg, HISAT: a fast spliced aligner with low memory requirements. *Nat Methods* **12**, 357-360 (2015).
5. H. Li *et al.*, The Sequence Alignment/Map format and SAMtools. *Bioinformatics* **25**, 2078-2079 (2009).
6. S. Anders, P. T. Pyl, W. Huber, HTSeq--a Python framework to work with high-throughput sequencing data. *Bioinformatics* **31**, 166-169 (2015).
7. C. Trapnell *et al.*, Differential gene and transcript expression analysis of RNA-seq experiments with TopHat and Cufflinks. *Nat Protoc* **7**, 562-578 (2012).
8. J. Harrow *et al.*, GENCODE: the reference human genome annotation for The ENCODE Project. *Genome Res* **22**, 1760-1774 (2012).
9. J. Fan *et al.*, Characterizing transcriptional heterogeneity through pathway and gene set overdispersion analysis. *Nat Methods* **13**, 241-244 (2016).
10. D. Kobak, P. Berens, The art of using t-SNE for single-cell transcriptomics. *Nat Commun* **10**, 5416 (2019).
11. G. Finak *et al.*, MAST: a flexible statistical framework for assessing transcriptional changes and characterizing heterogeneity in single-cell RNA sequencing data. *Genome Biol* **16**, 278 (2015).
12. A. Subramanian *et al.*, Gene set enrichment analysis: a knowledge-based approach for interpreting genome-wide expression profiles. *Proc Natl Acad Sci U S A* **102**, 15545-15550 (2005).
13. C. Trapnell *et al.*, The dynamics and regulators of cell fate decisions are revealed by pseudotemporal ordering of single cells. *Nat Biotechnol* **32**, 381-386 (2014).
14. S. Aibar *et al.*, SCENIC: single-cell regulatory network inference and clustering. *Nat Methods* **14**, 1083-1086 (2017).



15. A. Chotteau-Lelievre, P. Dolle, F. Gofflot, Expression analysis of murine genes using in situ hybridization with radioactive and nonradioactively labeled RNA probes. *Methods Mol Biol* **326**, 61-87 (2006).
16. C. K. Ng *et al.*, Deciphering the Sox-Oct partner code by quantitative cooperativity measurements. *Nucleic acids research* **40**, 4933-4941 (2012).
17. Y. H. Huang, A. Jankowski, K. S. Cheah, S. Prabhakar, R. Jauch, SOXE transcription factors form selective dimers on non-compact DNA motifs through multifaceted interactions between dimerization and high-mobility group domains. *Sci Rep* **5**, 10398 (2015).
18. E. Sock *et al.*, Loss of DNA-dependent dimerization of the transcription factor SOX9 as a cause for campomelic dysplasia. *Hum Mol Genet* **12**, 1439-1447 (2003).
19. D. S. Tan *et al.*, Directed Evolution of an Enhanced POU Reprogramming Factor for Cell Fate Engineering. *Mol Biol Evol* **38**, 2854-2868 (2021).
20. S. M. Dymecki, Flp recombinase promotes site-specific DNA recombination in embryonic stem cells and transgenic mice. *Proc Natl Acad Sci U S A* **93**, 6191-6196 (1996).
21. D. M. Bell *et al.*, SOX9 directly regulates the type-II collagen gene. *Nature genetics* **16**, 174-178 (1997).
